# Supplementary material for: Unexpected liquid crystalline behaviour of three-ring bent-core mesogens: bis(4-subst.-phenyl) 2-methyl-iso-phthalates
Source: Royal Society of Chemistry journal article supplement (doi:10.1039/c2sm07064b), 2012-01-01
Supplement: c2sm07064b.pdf [file c2sm07064b.pdf]

## Supporting Information

### Unexpected liquid crystalline behaviour of three-ring bent-core mesogens: Bis(4-subst.-phenyl) 2-methyl-*iso*-phthalates

Wolfgang Weissflog<sup>a,\*</sup>, Ute Baumeister<sup>a</sup>, Maria-Gabriela Tamba<sup>a,b</sup>, Gerhard Pelzl<sup>a</sup>, Horst Kresse<sup>a</sup>, Rudolf Friedemann<sup>a</sup>, Günther Hempel<sup>c</sup>, Ricardo Kurz<sup>c</sup>, Matthias Roos<sup>c</sup>, Kurt Merzweiler<sup>d</sup>, Antal Jáklí<sup>e</sup>, Cuiyu Zhang<sup>e</sup>, Nicholas Diorio<sup>e</sup>, Ralf Stannarius<sup>f</sup>, Alexey Eremin<sup>f</sup>, Ulrike Kornek<sup>f</sup>

<sup>a</sup> Martin-Luther-University Halle-Wittenberg, Institute of Chemistry, Physical Chemistry, von-Danckelmann-Platz 4, 06120 Halle, Germany

<sup>b</sup> present address: University of Hull, Department of Chemistry, Hull, HU6 7RX, UK

<sup>c</sup> Martin-Luther-University Halle-Wittenberg, Institute of Physics, Betty-Heimann-Str. 7, 06120 Halle, Germany

<sup>d</sup> Martin-Luther-University Halle-Wittenberg, Institute of Chemie, Inorganic Chemistry, Kurt-Mothes-Strasse 2, 06120 Halle, Germany

<sup>e</sup> Kent State University, Liquid Crystal Institute, Kent, Ohio 44242, USA

<sup>f</sup> Otto-von-Guericke University Magdeburg, Institute of Experimental Physics, Universitätsplatz 2, 39106 Magdeburg, Germany

#### 1. Synthesis and analytical data

1.1. Symmetric compounds **3a-3n**, **4a-4i**, **5a-5l**, **6a-6c**

1.2. Variation of the reaction pathway to prepare compound **5j**

1.3. Synthesis of the non-symmetric compound **2c**

1.1. Symmetric compounds **3a-3n**, **4a-4i**, **5a-5l**, **6a-6c**

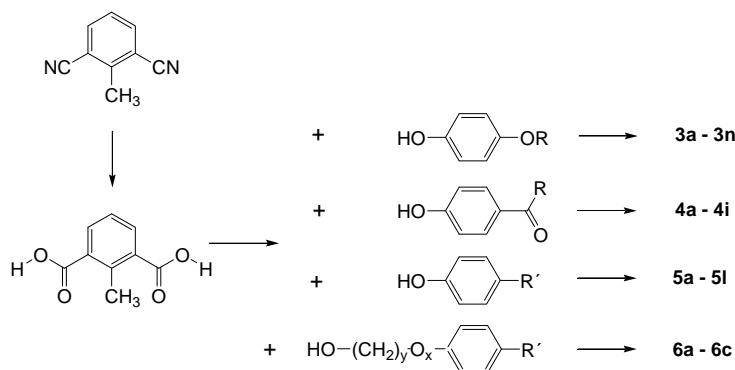

Scheme S1: General scheme of the preparation of the symmetric compounds **3a-3n**, **4a-4i**, **5a-5l**, **6a-6c**

## General procedure to prepare symmetric bis(4-subst.-phenyl) 2-methylisophthalates **3a-3n**, **4a-4i**, **5a-5l**, **6a-6c**

A mixture of 0.022 mol of the corresponding 4-subst.-phenol or hydroxy compound, respectively, 0.01 mol 2-methylisophthalic acid (prepared by saponification of 2,6-dicyanotoluene according to Lindsay et al. [S1]), 0.022 mol dicyclohexylcarbodiimide and a catalytic amount of 4-dimethylaminopyridine in 100 ml dichloromethane was stirred at room temperature for about 24 h. Precipitated dicyclohexylurea was separated, the dichloromethane evaporated and the crude material purified by recrystallization from DMF-ethanol.

### Bis(4-n-decyloxyphenyl) 2-methylisophthalate **3j**

Elemental analysis:  $C_{41}H_{56}O_6$  (Mm: 644.41). C 76.36, H 8.75 (calc.); C 76.32, H 8.70 (found).

$^1H$  NMR (400 MHz,  $CDCl_3$ ):  $\delta$  0.85-0.89 (m, 6 H, 2 x  $CH_3$ ), 1.26-1.78 (m, 32 H, 16 x  $CH_2$ ), 2.85 (s, 3H, Ar- $CH_3$ ), 3.92-3.96 (m, 4 H,  $OCH_2$ ), 6.91-6.94 (m, 4 H, Ar-H), 7.09-7.13 (m, 4 H, Ar-H), 7.41 (t,  $^3J = 8.5$  Hz, 1 H, Ar-H), 8.14 (d,  $^3J = 7.9$  Hz, 2 H, Ar-H)

### Bis(4-n-propionylphenyl) 2-methylisophthalate **4c**

Elemental analysis:  $C_{27}H_{24}O_6$  (Mm: 444.16). C 72.96, H 5.44 (calc.); C 72.94, H 5.46 (found).

$^1H$  NMR (400 MHz,  $CDCl_3$ ):  $\delta$  1.21-1. (m, 6 H, 2 x  $CH_3$ ), 2.88 (s, 3H, Ar- $CH_3$ ), 2.98-3.03 (m, 4 H,  $CH_2CO$ ), 7.31-7.34 (m, 4 H, Ar-H), 7.41 (t,  $^3J = 7.8$  Hz, 1 H, Ar-H), 8.04-8.07 (m, 4 H, Ar-H), 8.21 (d,  $^3J = 7.9$  Hz, 2 H, Ar-H)

## 1.2. Variation of the reaction pathway to prepare compound **5j**

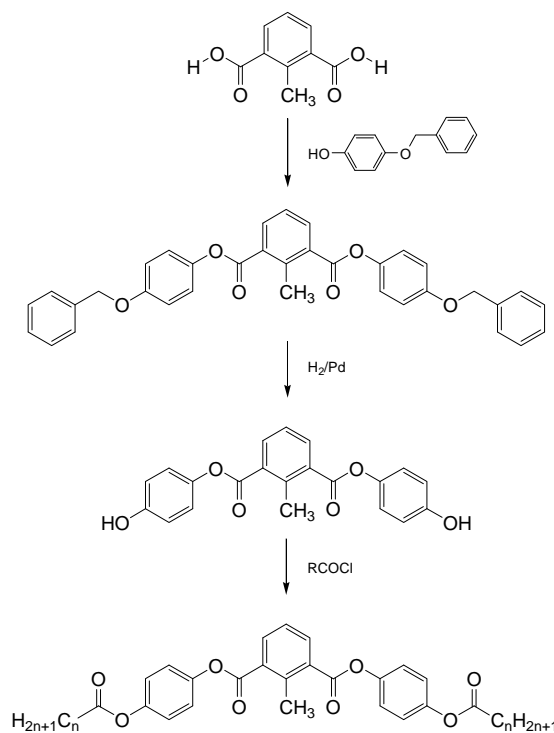

Scheme S2: Reaction pathway to prepare compound **5j** ( $n = 7$ )

### Bis(4-benzyloxyphenyl) 2-methylisophthalate

A mixture of 4.4 g (0.022 mol) 4-benzyloxyphenol, 1.8 g (0.01 mol) 2-methylisophthalic acid, 4.6 g (0.022 mol) dicyclohexylcarbodiimide and a catalytic amount of 4-dimethylaminopyridine in 150 ml dichloromethane was stirred at room temperature for about 24 h. Precipitated dicyclohexylurea was separated, the dichloromethane evaporated and the crude material purified by recrystallization from DMF-ethanol. Yield: 4.06 g, 74.6%, mp. 165-167 °C. Elemental analysis: C<sub>35</sub>H<sub>28</sub>O<sub>6</sub> (Mm = 544.19). C 77.19, H 5.18 (calc.); C 77.20, H 5.19 (found).

<sup>1</sup>H NMR (400 MHz, CDCl<sub>3</sub>): δ 2.85(s, 1 H, Ar-H), 5.07 (s, 4 H, ArCH<sub>2</sub>O), 7.00-7.03 (m, 4 H, Ar-H), 7.11-7.14 (m, 4 H, Ar-H), 7.32-7.38 (m, 10 H, Ar-H), 7.41 (t, <sup>3</sup>J = 7.5 Hz, 1 H, Ar-H), 8.14 (d, <sup>3</sup>J = 7.7 Hz, 2 H, Ar-H)

### Bis(4-hydroxyphenyl) 2-methylisophthalate

Hydrogenation of 2.7 g (0.005 mol) bis(4-benzyloxyphenyl) 2-methylisophthalate in 100 ml ethyl acetate with 0.9 g Pd 10% on carbon resulted in 1.5 g (82.0 %) white crystals, recrystallized from DMF-ethanol. mp. 224-226 °C. Elemental analysis: C<sub>21</sub>H<sub>16</sub>O<sub>6</sub> (Mm: 364.09). C 69.23, H 4.43 (calc.); C 69.21, H 4.47 (found).

<sup>1</sup>H NMR (400 MHz, CDCl<sub>3</sub>): δ 2.72 (s, 3 H, Ar-CH<sub>3</sub>), 6.75-6.78 (m, 4 H, Ar-H), 6.88-6.92 (m, 4 H, Ar-H), 7.30 (t, <sup>3</sup>J = 7.8 Hz, 1 H, Ar-H), 8.01 (d, <sup>3</sup>J = 7.7 Hz, 2 H, Ar-H)

### Bis(4-octanoyloxyphenyl) 2-methylisophthalate **5j**

A solution of 0.72 g (0.002 mol) bis(4-hydroxyphenyl) 2-methylisophthalate, 0.60 ml (0.005 mol) triethylamine and a catalytic amount of 4-dimethylaminopyridine in 30 ml toluene was cooled down to 10 °C. Under stirring 0.65 g (0.004 mol) octanoyl chloride was added dropwise. After stirring for 24 h at room temperature, the mixture was heated at 60 °C for further two hours. After cooling the triethylamine hydrochloride was separated and the solvent evaporated. The residue was crystallized from ethanol several times. Yield: 0.48 g (38.7 %). Melting behaviour see Table

Elemental analysis: C<sub>37</sub>H<sub>44</sub>O<sub>8</sub> (Mm 616.30), C 72.06, H 7.19 (calc.); C 72.14, H 7.24 (found)

<sup>1</sup>H NMR (400 MHz, CDCl<sub>3</sub>): δ 0.88 (t, <sup>3</sup>J = 6.5 Hz, 6 H, CH<sub>3</sub>), 1.29-1.50 (m, 16 H, CH<sub>2</sub>), 1.71-1.78 (m, 4 H, CH<sub>2</sub>CH<sub>2</sub>COO), 2.55 (t, <sup>3</sup>J = 7.5 Hz, 4 H, CH<sub>2</sub>COO), 2.86 (s, 3 H, Ar-CH<sub>3</sub>), 7.12-7.26 (m, 8 H, Ar-H), 7.44 (t, <sup>3</sup>J = 7.8 Hz, 1 H, Ar-H), 8.17 (d, <sup>3</sup>J = 7.9 Hz, 2 H, Ar-H)

### 1.3. Synthesis of the non-symmetric compound **2c**

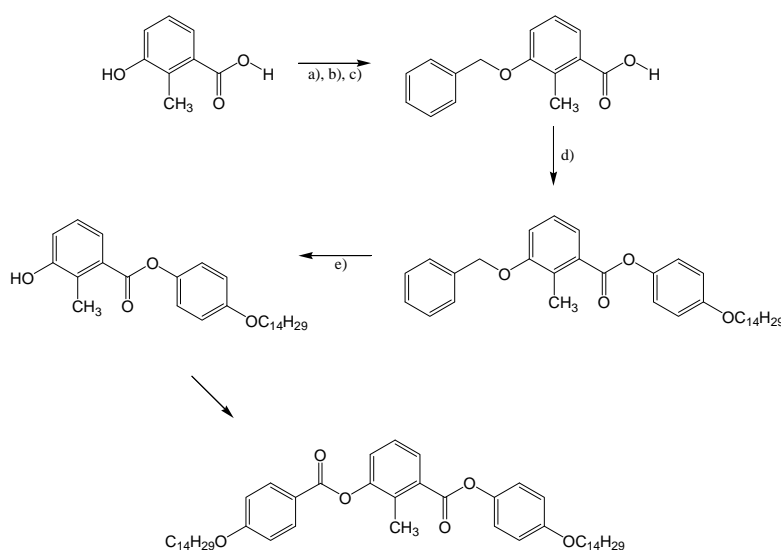

Scheme S3: Synthetic scheme for the preparation of the non-symmetric compound (**2c**): a) CH<sub>3</sub>OH/HCl; b) benzylbromide; c) KOH d) 4-n-tetradecyloxyphenol, DCC, CH<sub>2</sub>Cl<sub>2</sub>; e) Pd/H<sub>2</sub>; f) 4-n-tetradecyloxybenzoic acid, DCC, CH<sub>2</sub>Cl<sub>2</sub>

#### 3-Benzyloxy-2-methylbenzoic acid

3-Hydroxy-2-methylbenzoic acid was transferred to the methyl ester with HCl gas according to Peixoto et al. [S2]. Etherification with benzylbromide and saponification of the methyl ester resulted in 3-benzyloxy-2-methylbenzoic acid [S3].

Elemental analysis: C<sub>15</sub>H<sub>14</sub>O<sub>3</sub> (Mm: 242.09). C 74.36, H 5.82 (calc.); C 74.16, H 5.80 (found). mp. 125-127 °C. <sup>1</sup>H NMR (400 MHz, CDCl<sub>3</sub>): δ 2.58 (s, 3H, Ar-CH<sub>3</sub>), 5.10 (s, 2 H, CH<sub>2</sub>O), 7.09 (d, <sup>3</sup>J = 8.1 Hz, 1 H, Ar-H) 7.20 (t, <sup>3</sup>J = 8.0 Hz, 1 H, Ar-H), 7.32-7.45 (m, 5 H, Ar-H), 7.61 (d, <sup>3</sup>J = 7.9 Hz, 1 H, Ar-H)

#### 4-n-Tetradecyloxyphenyl 3-benzyloxy-2-methylbenzoate:

A mixture of 1.53 g (0.005 mol) 4-tetradecyloxyphenol, 1.21 g (0.005 mol) 3-benzyloxy-2-methylbenzoic acid, 1.04 g (0.005 mol) dicyclohexylcarbodiimide and a catalytic amount of 4-dimethylaminopyridine in 40 ml dichloromethane was stirred at room temperature for about 24 h. Precipitated dicyclohexylurea was separated, the dichloromethane evaporated and the crude material purified by crystallization from ethanol. Yield: 2.30 g, 86.8 %, mp. 67-68 °C. Elemental analysis: C<sub>35</sub>H<sub>46</sub>O<sub>4</sub> (Mm: 530.34). C 79.21, H 8.74 (calc.); C 79.12, H 8.71 (found). <sup>1</sup>H NMR (400 MHz, CDCl<sub>3</sub>): δ 0.85-0.87 (m, 3 H, CH<sub>3</sub>), 1.25-1.53 (m, 22 H, CH<sub>2</sub>), 1.73-1.80 (m, 2 H, OCH<sub>2</sub>CH<sub>2</sub>) 2.56 (s, 3 H, Ar-CH<sub>3</sub>), 3.94 (t, <sup>3</sup>J = 6.6, 2 H, CH<sub>2</sub>O) 5.11 (s, 2 H, CH<sub>2</sub>OAr), 6.89-6.93 (m, 3H, Ar-H), 7.08-7.11 (m, 3 H, Ar-H), 7.38-7.44 (m, 5 H, Ar-H), 7.64 (d, <sup>3</sup>J = 8.9 Hz, 1 H, Ar-H)

#### 4-n-Tetradecyloxyphenyl 3-hydroxy-2-methylbenzoate:

Hydrogenation of 2.3 g 4-n-tetradecyloxyphenyl 3-benzyloxy-2-methylbenzoate in 100 ml ethyl acetate with 0.9 g Pd 10% on carbon resulted in 1.34 g (70.5 %) white crystals, recrystallized from ethanol. mp. 65-66 °C °C.

Elemental analysis: C<sub>28</sub>H<sub>40</sub>O<sub>4</sub> (Mm: 440.29): C 76.33, H 9.15 (calc.); C 76.34, H 9.17 (found). <sup>1</sup>H NMR (400 MHz, CDCl<sub>3</sub>): δ 0.87 (t, <sup>3</sup>J = 6.8 Hz, 3 H, CH<sub>3</sub>), 1.25-1.33 (m, 22 H, CH<sub>2</sub>), 1.75-1.79 (m, 2 H, CH<sub>2</sub>CH<sub>2</sub>O), 2.51 (s, 3 H, Ar-CH<sub>3</sub>), 3.93 (t, <sup>3</sup>J = 6.6 Hz, 2 H, CH<sub>2</sub>O), 5.02 (s, 1 H, OH), 6.89-6.98 (m, 3 H, Ar-H), 7.08-7.15 (m, 3 H, Ar-H), 7.64 (d, <sup>3</sup>J = 7.6, 1 H, Ar-H)

#### 4-n-Tetradecyloxyphenyl 3-(4-n-tetradecyloxybenzoyloxy)-2-methylbenzoate (**2c**)

0.44 g (0.001 mol) 4-n-tetradecyloxyphenyl 3-hydroxy-2-methylbenzoate, 0.33 g (0.001 mol) 4-n-tetradecyloxybenzoic acid, 0.26 g (0.0012 mol) dicyclohexylcarbodiimide and a catalytic amount of 4-dimethylaminopyridine in 20 ml dichloromethane was stirred at room temperature for about 24 h. Precipitated dicyclohexylurea was separated, the dichloromethane evaporated and the crude material purified by crystallization from ethanol. Yield: 0.43 g, 56.9 %.

Elemental analysis: C<sub>49</sub>H<sub>72</sub>O<sub>6</sub> (Mm: 756.53). C 77.74, H 9.59 (calc.); C 77.84, H 9.61 (found). <sup>1</sup>H NMR (400 MHz, CDCl<sub>3</sub>): δ 0.85-0.88 (m, 6 H, CH<sub>3</sub>), 1.25-1.53 (m, 44 H, CH<sub>2</sub>), 1.73-1.84 (m, 4 H, CH<sub>2</sub>CH<sub>2</sub>O), 2.50 (s, 3 H, Ar-CH<sub>3</sub>), 3.95 (t, <sup>3</sup>J = 6.5 Hz, 2 H, CH<sub>2</sub>O), 4.03 (t, <sup>3</sup>J = 6.5 Hz, 2 H, CH<sub>2</sub>O), 6.90-7.11 (m, 6 H, Ar-H), 7.33-7.37 (m, 2 H, Ar-H), 8.01-8.03 (m, 1 H, Ar-H), 8.15 (d, <sup>3</sup>J = 8.9 Hz, 2 H, Ar-H)

## 2. Additional X-ray data

### 2.1. X-ray crystal structure analysis of **4b**

**Table S1:** Selected bond lengths (pm) and angles (°) for compound **4b** in the crystal, mean-square deviations in parentheses (atomic numbering see Fig. 2, Symmetry code i: x, 0.5 -y, z):

| Atoms                  | Bond length |
|------------------------|-------------|
| C(1)-C(2) <sup>i</sup> | 138.3(2)    |
| C(1)-C(2)              | 138.3(2)    |
| C(2)-C(3)              | 139.6(2)    |
| C(3)-C(4)              | 140.9(2)    |
| C(3)-C(6)              | 149.8(2)    |
| C(4)-C(3) <sup>i</sup> | 140.9(2)    |
| C(4)-C(5)              | 151.1(3)    |
| C(6)-O(2)              | 119.8(2)    |
| C(6)-O(1)              | 136.1(2)    |
| C(7)-C(12)             | 137.8(2)    |
| C(7)-C(8)              | 138.3(2)    |
| C(7)-O(1)              | 141.1(2)    |
| C(8)-C(9)              | 138.4(2)    |
| C(9)-C(10)             | 140.1(2)    |
| C(10)-C(11)            | 139.2(2)    |

|             |          |
|-------------|----------|
| C(10)-C(13) | 150.7(2) |
| C(11)-C(12) | 139.3(2) |
| C(13)-O(3)  | 122.2(2) |
| C(13)-C(14) | 150.8(2) |
| C(14)-C(15) | 151.5(2) |

| <b>Atoms</b>                 | <b>Bond angle</b> |
|------------------------------|-------------------|
| C(2) <sup>i</sup> -C(1)-C(2) | 119.7(2)          |
| C(1)-C(2)-C(3)               | 120.3(2)          |
| C(2)-C(3)-C(4)               | 121.4(2)          |
| C(2)-C(3)-C(6)               | 117.1(1)          |
| C(4)-C(3)-C(6)               | 121.34(15)        |
| C(3) <sup>i</sup> -C(4)-C(3) | 116.82(19)        |
| C(3) <sup>i</sup> -C(4)-C(5) | 121.6(1)          |
| C(3)-C(4)-C(5)               | 121.6(1)          |
| O(2)-C(6)-O(1)               | 123.5(1)          |
| O(2)-C(6)-C(3)               | 126.64(14)        |
| O(1)-C(6)-C(3)               | 109.80(13)        |
| C(12)-C(7)-C(8)              | 121.98(14)        |
| C(12)-C(7)-O(1)              | 115.9(1)          |
| C(8)-C(7)-O(1)               | 121.8(1)          |
| C(7)-C(8)-C(9)               | 118.4(1)          |
| C(8)-C(9)-C(10)              | 121.4(1)          |
| C(11)-C(10)-C(9)             | 118.5(1)          |
| C(11)-C(10)-C(13)            | 122.1(1)          |
| C(9)-C(10)-C(13)             | 119.4(1)          |
| C(10)-C(11)-C(12)            | 120.7(1)          |
| C(7)-C(12)-C(11)             | 119.01(14)        |
| O(3)-C(13)-C(10)             | 119.74(14)        |
| O(3)-C(13)-C(14)             | 121.4(1)          |
| C(10)-C(13)-C(14)            | 118.9(1)          |
| C(13)-C(14)-C(15)            | 113.8(2)          |
| C(6)-O(1)-C(7)               | 120.5(1)          |

## 2.2. X-ray diffraction on the liquid crystalline phases:

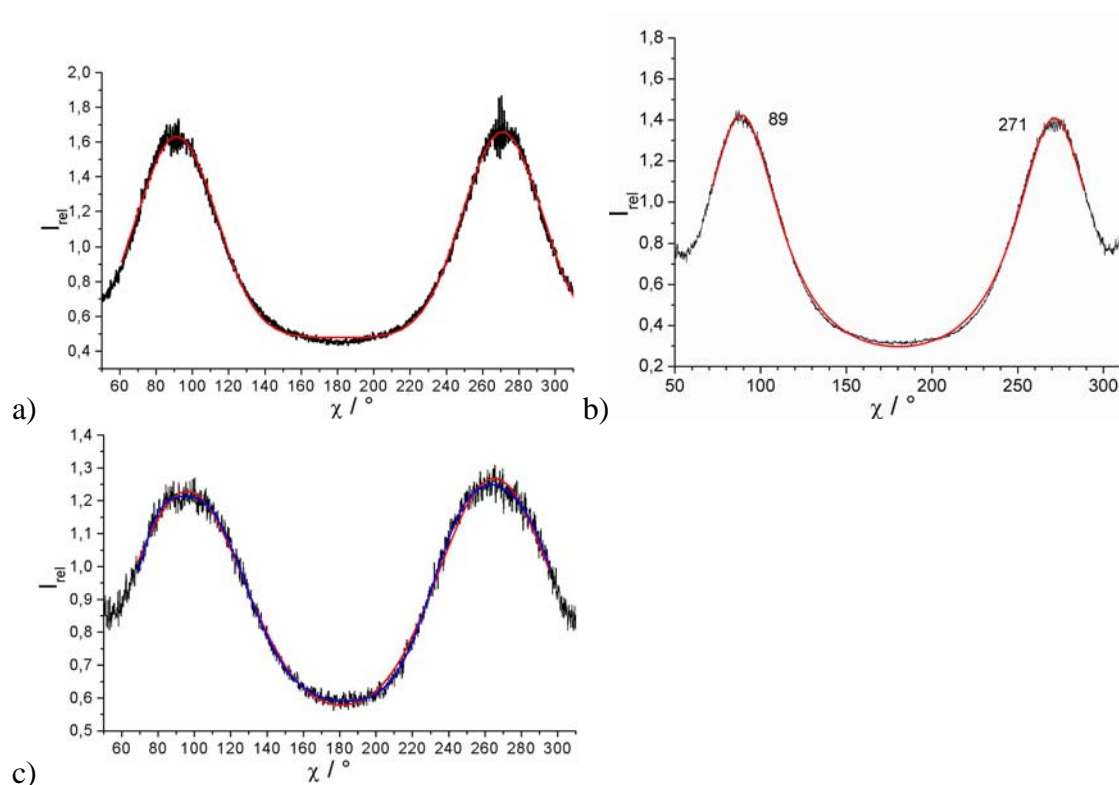

**Figure S1.**  $\chi$ -scans for the outer diffuse scattering for the X-ray patterns on surface-aligned samples of compounds **4h** at 110 °C (a), **4i** at 115 °C (b), **5k** at 105 °C (c), all on cooling, with Gaussian fits for the relative intensity  $I_{rel} = I(T)/I(\text{isotropic liquid})$  (black lines) for two maxima (red lines, in (c) for the SmC phase only for comparison) and for 4 maxima (blue line).

### 3. Quantum chemical studies

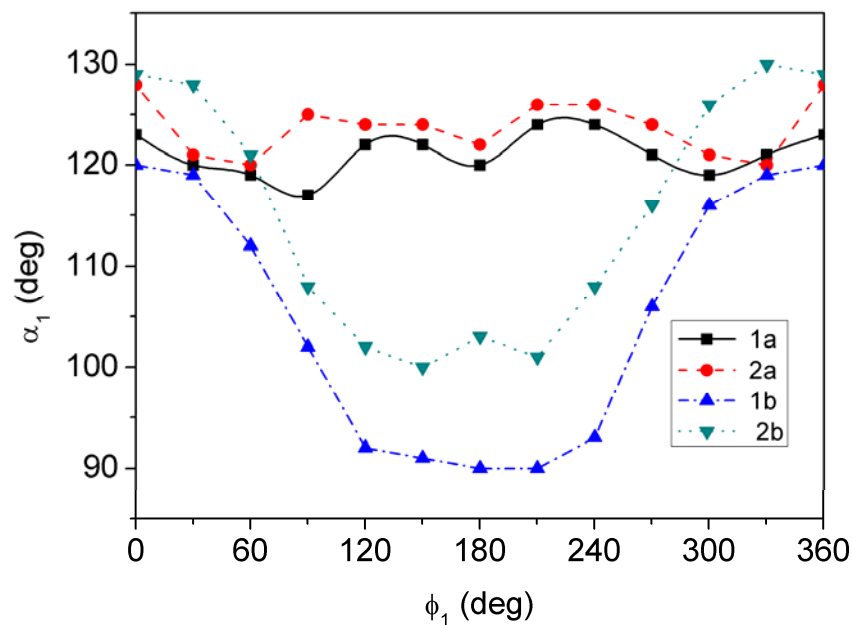

Figure S2 One-fold scans of the bending angle  $\alpha_1$  related to the torsion angles  $\phi_1$  /C-O (**1a**, **2a**) and  $\phi_1$  /C-C (**1b**, **2b**)

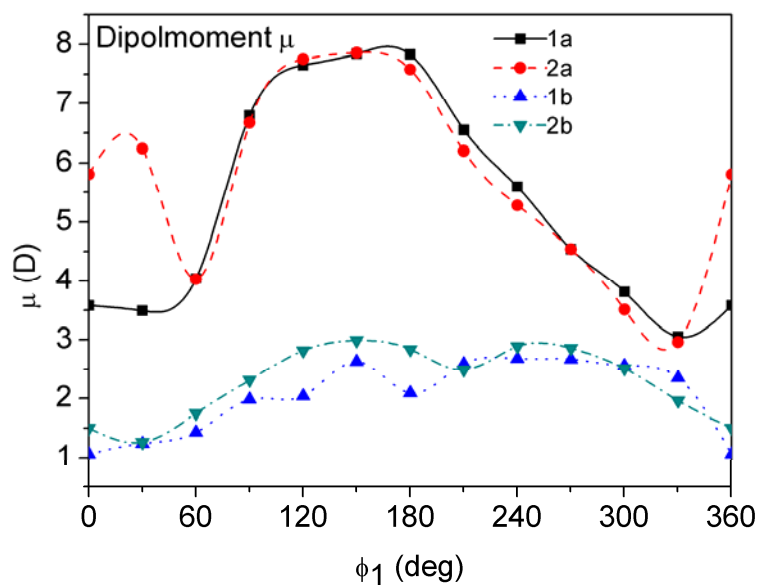

Figure S3 One-fold scans of the dipole moment  $\mu$  related to the torsion angles  $\phi_1$  /C-O (**1a**, **2a**) and  $\phi_1$  /C-C (**1b**, **2b**)



## References

- [S1] W. S. Lindsay, P. Stokes, L. G. Humber, V. Boekelheide, *J. Am. Chem. Soc.* 1961, 83, 943-949
- [S2] C. Peixoto, P. Laurin, M. Klinch, C. Dupuis-Hamelin, P. Mauvais, P. Lassaigne, A. Bonnefoy, B. Musicki, *Tetrahedron Lett.* 2000, 41, 1741-1745
- [S3] PLEXXIKON, INC, WO2007/2325 A1, 2007
